# Supplementary material
Source: bioRxiv or medRxiv preprint supplement (https://medrxiv.org/highwire/filestream/81018/field_highwire_adjunct_files/1/2020.05.11.20097022-2.pdf)
Supplement: Supplementary file [file 2020.05.11.20097022-2.pdf]

The Robert Jones and Agnes Hunt  
Orthopaedic Hospital

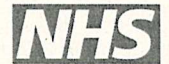

NHS Foundation Trust

Research Office  
Oswestry  
Shropshire  
SY10 7AG  
Telephone 01691 404451  
Email: teresa.jones6@nhs.net

Dr Richa Kulshrestha  
Consultant Paediatrician in Neurodisability  
(Special interest in Neuromuscular disorders)  
RJAH Orthopaedic Hospital  
Oswestry

Monday 6<sup>th</sup> April 2020

Dear Richa

**Re: FSHD PPIE survey 2015/16**

Following your involvement of the FSHD patient community in the design of your pilot study to look at the potential of a larger study to investigate the use and benefit of arm cycling in FSHD, by way of a survey monkey and focus groups, as per the principles set out in NIHR INVOLVE, the study was completed successfully.

As the Sponsor Representative for this study, I acknowledge and support the publication of the experience and feedback from the patient focus groups on the understanding that no patient identifiable data is published. I do not consider this data to be part of the research data, and as such does not require separate ethical approval via the HRA.

Regards

*TERESA JONES*

PR

Andrew Roberts  
Director of Research.

*Research Manager*  
*16<sup>th</sup> April 2020.*
